# Supplementary material for: Chinese Pediatrician Attitudes and Practices Regarding Child Exposure to Secondhand Smoke (SHS) and Clinical Efforts against SHS Exposure
Source: Int J Environ Res Public Health. 2015 May 8;12(5):5013–25. doi: 10.3390/ijerph120505013 (PMC4454951; doi:10.3390/ijerph120505013)
Supplement: Supplementary File 1 [file ijerph-12-05013-s001.pdf]

# Chinese Pediatrician Attitudes and Practices Regarding Child Exposure to Secondhand Smoke (SHS) and Clinical Effort against SHS Exposure

**Table S1.** Major questions included in the survey questionnaire and the responses categories.

| Domains                                          | Survey Questions                                                                                                       | Response Categories                                              |
|--------------------------------------------------|------------------------------------------------------------------------------------------------------------------------|------------------------------------------------------------------|
| Pediatricians' perceived barriers                | Parents are resistant to discussion about smoking                                                                      | Major Barrier, Moderate Barrier, Minor Barrier and Not a Barrier |
|                                                  | It is hard to find a time to talk with parents                                                                         | Major Barrier, Moderate Barrier, Minor Barrier and Not a Barrier |
|                                                  | Lack of professional training in the area of tobacco cessation counseling                                              | Major Barrier, Moderate Barrier, Minor Barrier and Not a Barrier |
|                                                  | Lack of a standard of care requiring pediatricians to provide smoking cessation or SHS exposure reduction intervention | Major Barrier, Moderate Barrier, Minor Barrier and Not a Barrier |
|                                                  | Lack of insurance coverage for smoking cessation medication                                                            | Major Barrier, Moderate Barrier, Minor Barrier and Not a Barrier |
|                                                  | It is hard to make system changes that would support parental smoking cessation at our hospital                        | Major Barrier, Moderate Barrier, Minor Barrier and Not a Barrier |
|                                                  | Not convinced that advice and / or available therapies would work                                                      | Major Barrier, Moderate Barrier, Minor Barrier and Not a Barrier |
| Support for smoking bans                         | Smoking in enclosed public places should be prohibited                                                                 | Strongly agree, Agree, Disagree and Strongly disagree            |
|                                                  | Smoking is not allowed in any indoor room                                                                              | Strongly agree, Agree, Disagree and Strongly disagree            |
|                                                  | Smoking is not allowed in car                                                                                          | Strongly agree, Agree, Disagree and Strongly disagree            |
| Support for clinical effort against SHS exposure | Pediatricians can help patients' parents to stop smoking                                                               | Strongly agree, Agree, Disagree and Strongly disagree            |
|                                                  | Smoking cessation counseling is not an efficient use of my time                                                        | Strongly agree, Agree, Disagree and Strongly disagree            |
|                                                  | Beliefs regarding effectiveness of physician counseling for smoking cessation                                          | Strongly agree, Agree, Disagree and Strongly disagree            |
|                                                  | It is easy for me to find resources in my hospital to help my patient's parents to quit smoking                        | Strongly agree, Agree, Disagree and Strongly disagree            |
|                                                  | Physicians should not smoke in front of their patients                                                                 | Strongly agree, Agree, Disagree and Strongly disagree            |

Table S1. Cont.

| Domains                                    | Survey Questions                                                                                               | Response Categories                                   |
|--------------------------------------------|----------------------------------------------------------------------------------------------------------------|-------------------------------------------------------|
| Attitudes towards counseling and treatment | Physicians should advise patients who smoke to avoid smoking around children                                   | Strongly agree, Agree, Disagree and Strongly disagree |
|                                            | Physicians should routinely ask about their patients smoking habits                                            | Strongly agree, Agree, Disagree and Strongly disagree |
|                                            | Physicians should routinely advise their smoking patients to quit smoking                                      | Strongly agree, Agree, Disagree and Strongly disagree |
|                                            | I am not familiar with the guidelines for stop smoking                                                         | Strongly agree, Agree, Disagree and Strongly disagree |
|                                            | I am unaware of the best strategies for helping my patients' parents to stop smoking                           | Strongly agree, Agree, Disagree and Strongly disagree |
|                                            | Pharmacological products are effective in helping people quit smoking                                          | Strongly agree, Agree, Disagree and Strongly disagree |
|                                            | My current knowledge is sufficient for helping parents to reduce SHS exposure to children                      | Strongly agree, Agree, Disagree and Strongly disagree |
|                                            | My current knowledge is sufficient for helping patients to stop smoking                                        | Strongly agree, Agree, Disagree and Strongly disagree |
|                                            | I can assess a smoker's different stages of readiness to quit                                                  | Strongly agree, Agree, Disagree and Strongly disagree |
|                                            | SHS causes sudden Infant Death Syndrome                                                                        | Yes, No, and Don't know                               |
| Knowledge of SHS exposure                  | SHS causes adult lung cancer                                                                                   | Yes, No, and Don't know                               |
|                                            | SHS causes adult heart disease                                                                                 | Yes, No, and Don't know                               |
|                                            | SHS causes bronchitis                                                                                          | Yes, No, and Don't know                               |
|                                            | SHS causes children's pulmonary disease                                                                        | Yes, No, and Don't know                               |
|                                            | SHS causes asthma in children                                                                                  | Yes, No, and Don't know                               |
|                                            | SHS causes respiratory infections in children                                                                  | Yes, No, and Don't know                               |
|                                            | Breathing air in a room today where people smoked yesterday can harm the health of infants and children        | Yes, No, and Don't know                               |
|                                            | Paternal smoking increases the risk of lower respiratory tract illnesses such as pneumonia in exposed children | Yes, No, and Don't know                               |

### **Copy Right Statement**

These questions were used by the co-authors (Abdullah and Winickoff) in their earlier studies and agreed to publish the questionnaire in relation to the current publication.

© 2015 by the authors; licensee MDPI, Basel, Switzerland. This article is an open access article distributed under the terms and conditions of the Creative Commons Attribution license (<http://creativecommons.org/licenses/by/4.0/>).
